# Supplementary material
Source: PubMed Central journal article supplement (PMC4814186)
Supplement: ASN.2015020114_ASN2015020114SupplementaryData.pdf [file ASN.2015020114_ASN2015020114SupplementaryData.pdf]

## **Supplementary Materials**

**Supplementary Table 1. Comparison of baseline characteristics and outcome between non-infectious-related and HCV-related MC glomerulonephritis.**

|                                                        | Non-infectious MC<br>glomerulonephritis<br>n=80 | HCV (+) MC<br>glomerulonephritis<br>n=34 | <i>P</i>          |
|--------------------------------------------------------|-------------------------------------------------|------------------------------------------|-------------------|
| <b>Epidemiological data</b>                            |                                                 |                                          |                   |
| - Age at diagnosis (years), mean ± SD                  | 62.6 ± 14.1                                     | 58.8 ± 13.3                              | 0.19              |
| - Women, n (%)                                         | 50 (62.5)                                       | 14 (41.2)                                | 0.06              |
| <b>Extrarenal manifestations at presentation</b>       |                                                 |                                          |                   |
| - Skin lesions, n (%)                                  | 57 (71.3)                                       | 23 (67.6)                                | 0.87              |
| - Purpura, n (%)                                       | 55 (68.8)                                       | 22 (64.7)                                | 0.84              |
| - Ulcers, n (%)                                        | 6 (7.5)                                         | 1 (2.9)                                  | 0.62              |
| - Necrosis, n (%)                                      | 1 (1.3)                                         | 1 (2.9)                                  | 0.88              |
| - Peripheral neuropathy, n (%)                         | 34 (42.5)                                       | 19 (55.9)                                | 0.27              |
| - Arthralgias/Arthritis, n (%)                         | 28 (35)                                         | 11 (32.4)                                | 0.95              |
| - Gut vasculitis, n (%)                                | 9 (11.3)                                        | 3 (8.8)                                  | 0.96              |
| - CNS involvement, n (%)                               | 1 (1.3)                                         | 7 (20.6)                                 | <b>0.001</b>      |
| <b>Biological features at presentation</b>             |                                                 |                                          |                   |
| - Type II MC, n (%)                                    | 75 (97.4)                                       | 28 (82.4)                                | <b>0.02</b>       |
| - Hypocomplementemia, n (%)                            | 57 (81.4)                                       | 26 (76.5)                                | 0.74              |
| <b>Renal parameters at presentation</b>                |                                                 |                                          |                   |
| - Hypertension, n (%)                                  | 58 (85.3)                                       | 25 (73.5)                                | 0.24              |
| - Proteinuria, mean ± SD                               | 3.5 ± 3                                         | 4.3 ± 4.0                                | 0.22              |
| - ≥ 1 g/d, n (%)                                       | 67 (84.8)                                       | 30 (88.2)                                | 0.58              |
| - ≥ 3 g/d, n (%)                                       | 39 (49.4)                                       | 22 (64.7)                                | 0.14              |
| - Hematuria, n (%)                                     | 66 (97.4)                                       | 27 (79.4)                                | <b>0.005</b>      |
| - Serum creatinine, mean ± SD                          | 173.0 ± 108.7                                   | 202.3 ± 178.1                            | 0.29              |
| - eGFR, mean ± SD                                      | 39.5 ± 20.4                                     | 43.9 ± 27.5                              | 0.35              |
| - < 60 mL/min/1.73 m <sup>2</sup> , n (%)              | 65 (82.3)                                       | 24 (70.6)                                | 0.25              |
| - Dialysis, n (%)                                      | 4 (5.1)                                         | 1 (2.9)                                  | 0.78              |
| <b>Follow-up</b> (months), mean ± SD                   | 49.9 ± 45.5                                     | 26.9 ± 23.9                              | <b>0.006</b>      |
| <b>Relapses</b> , n (%)                                | 32 (42.7)                                       | 10 (29.4)                                | 0.27              |
| - Delay to 1 <sup>st</sup> relapse (months), mean ± SD | 28.2 ± 19.4                                     | 5.7 ± 7.0                                | <b>0.002</b>      |
| <b>Administered Treatments</b>                         |                                                 |                                          |                   |
| - Antiviral treatment                                  | -                                               | 33 (97.1)                                |                   |
| - Steroids, n (%)                                      | 75 (98.7)                                       | 15 (44.1)                                | <b>&lt;0.0001</b> |
| - Steroids alone, n (%)                                | 12 (15.8)                                       | 0 (0.0)                                  | <b>0.03</b>       |
| - Rituximab, n (%)                                     | 41 (53.9)                                       | 22 (64.7)                                | 0.40              |
| - Cyclophosphamide, n (%)                              | 41 (53.9)                                       | 3 (8.8)                                  | <b>&lt;0.001</b>  |
| - Plasma exchanges, n (%)                              | 25 (32.9)                                       | 7 (20.6)                                 | 0.28              |
| <b>Renal parameters at last follow-up</b>              |                                                 |                                          |                   |
| - Proteinuria > 0.5 g/d, n (%)                         | 12 (19)                                         | 5 (14.7)                                 | 0.72              |
| - Hematuria, n (%)                                     | 18 (28.6)                                       | 5 (14.7)                                 | 0.92              |
| - Serum creatinine, mean ± SD                          | 167.1 ± 144.8                                   | 149.5 ± 125.2                            | 0.62              |
| - eGFR <sub>LFup</sub> , mean ± SD                     | 50.2 ± 26.1                                     | 50.7 ± 21.2                              | 0.94              |
| <b>Clinical response at last follow-up</b>             |                                                 |                                          |                   |
| -NR, n (%)                                             | 16 (17.9)                                       | 4 (12.9)                                 | 0.52              |
| -PR, n (%)                                             | 18 (23.1)                                       | 9 (29)                                   | 0.69              |
| -CR, n (%)                                             | 46 (59)                                         | 18 (58.1)                                | 0.90              |
| <b>Overall hematological malignancy</b> , n (%)        | 28 (35.4)                                       | 9 (26.5)                                 | 0.48              |
| <b>Severe Infections</b> , n (%)                       | 23 (29.1)                                       | 2 (5.9)                                  | <b>0.02</b>       |
| <b>Death</b> , n (%)                                   | 19 (24)                                         | 5 (14.7)                                 | 0.39              |

SD, standard deviation; g/d, gram/day; eGFR, estimated glomerular filtration rate expressed in mL/min/1.73 m<sup>2</sup>; NR, non-responder; PR, partial remission; CR, complete remission. Bold indicates significant p values.
